# Supplementary material for: The Post-Acute Phase of SARS-CoV-2 Infection in Two Macaque Species Is Associated with Signs of Ongoing Virus Replication and Pathology in Pulmonary and Extrapulmonary Tissues
Source: MDPI journal article supplement (doi:10.3390/v13081673), 2021-08-23
Supplement: s1 [file s1]

## Supporting information

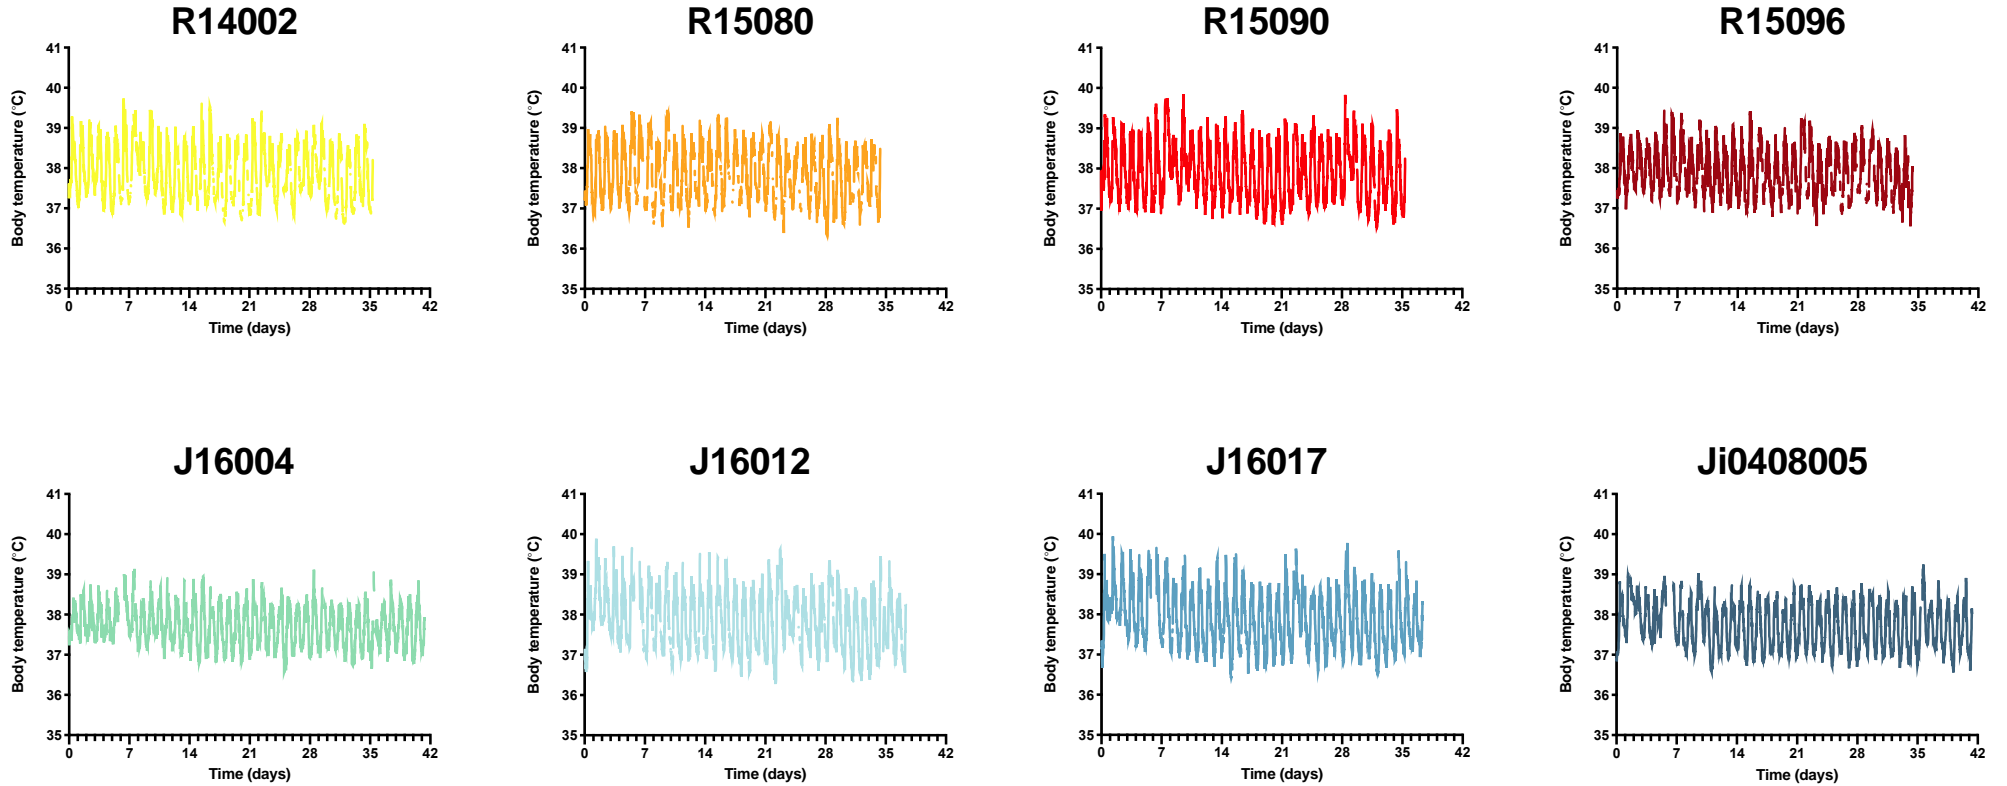

**Figure S1.** Body temperatures of all animals. Body temperatures were measured using a digital telemetric device during the entire study. The gaps in the graphs are due to data loss during measurement.

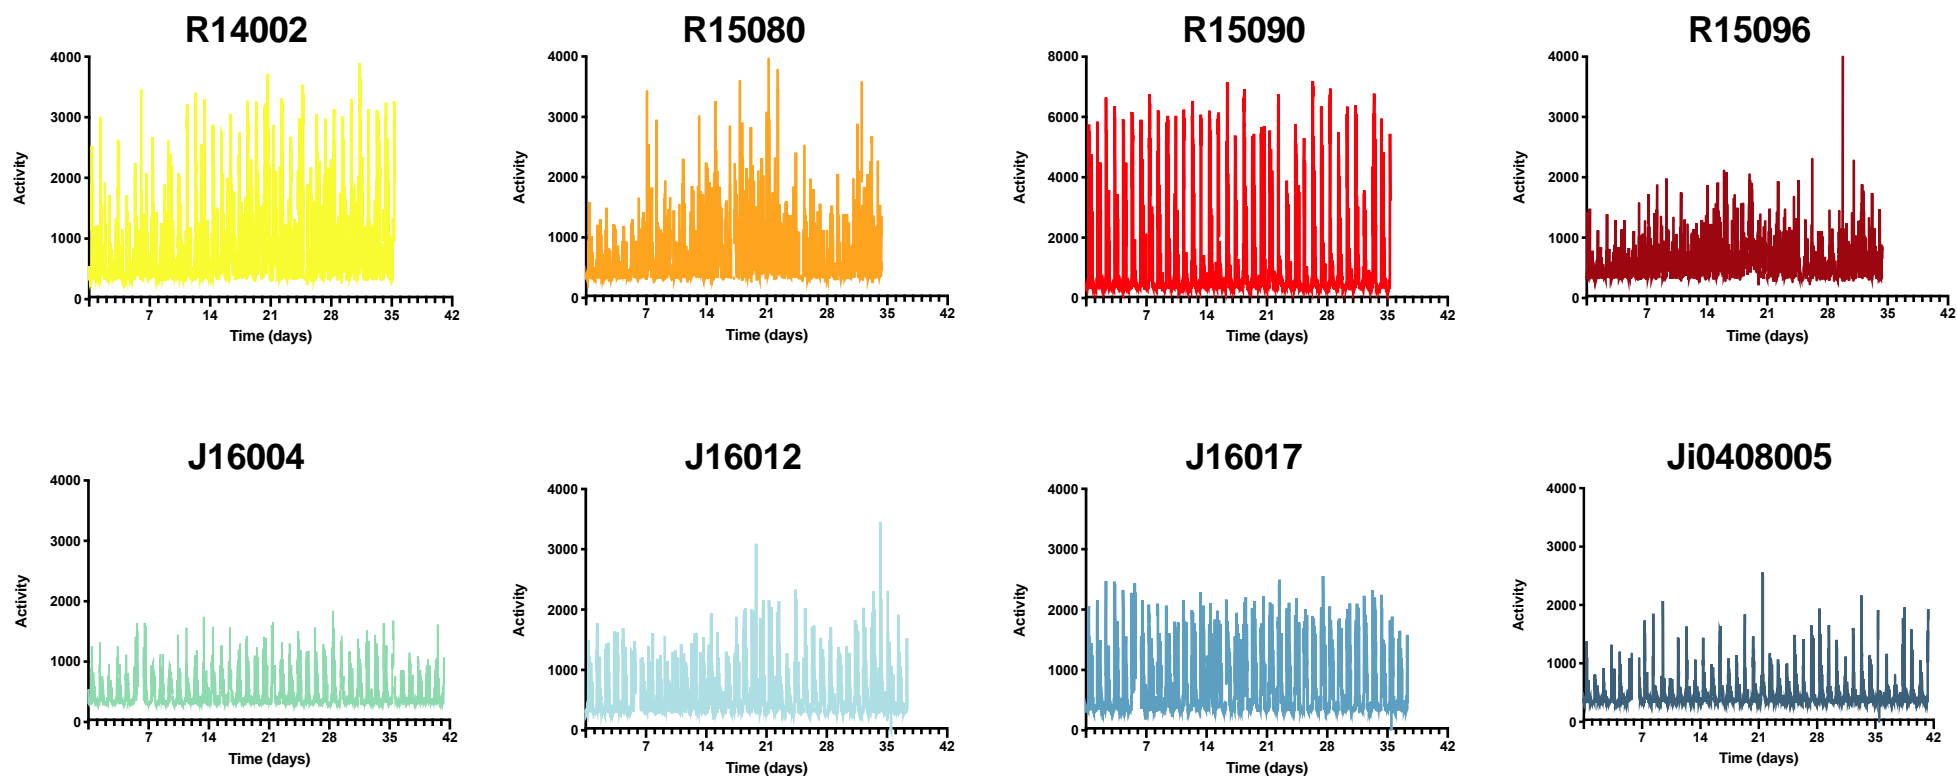

**Figure S2.** Activity of all animals. (A) The activity of each animal was measured using a digital telemetric device during the entire study. Gaps in the graphs are due to data loss during measurement. (B) Cumulative activity scores of the first two weeks compared to the third week of the study, calculated as total area under the curve for the given period.

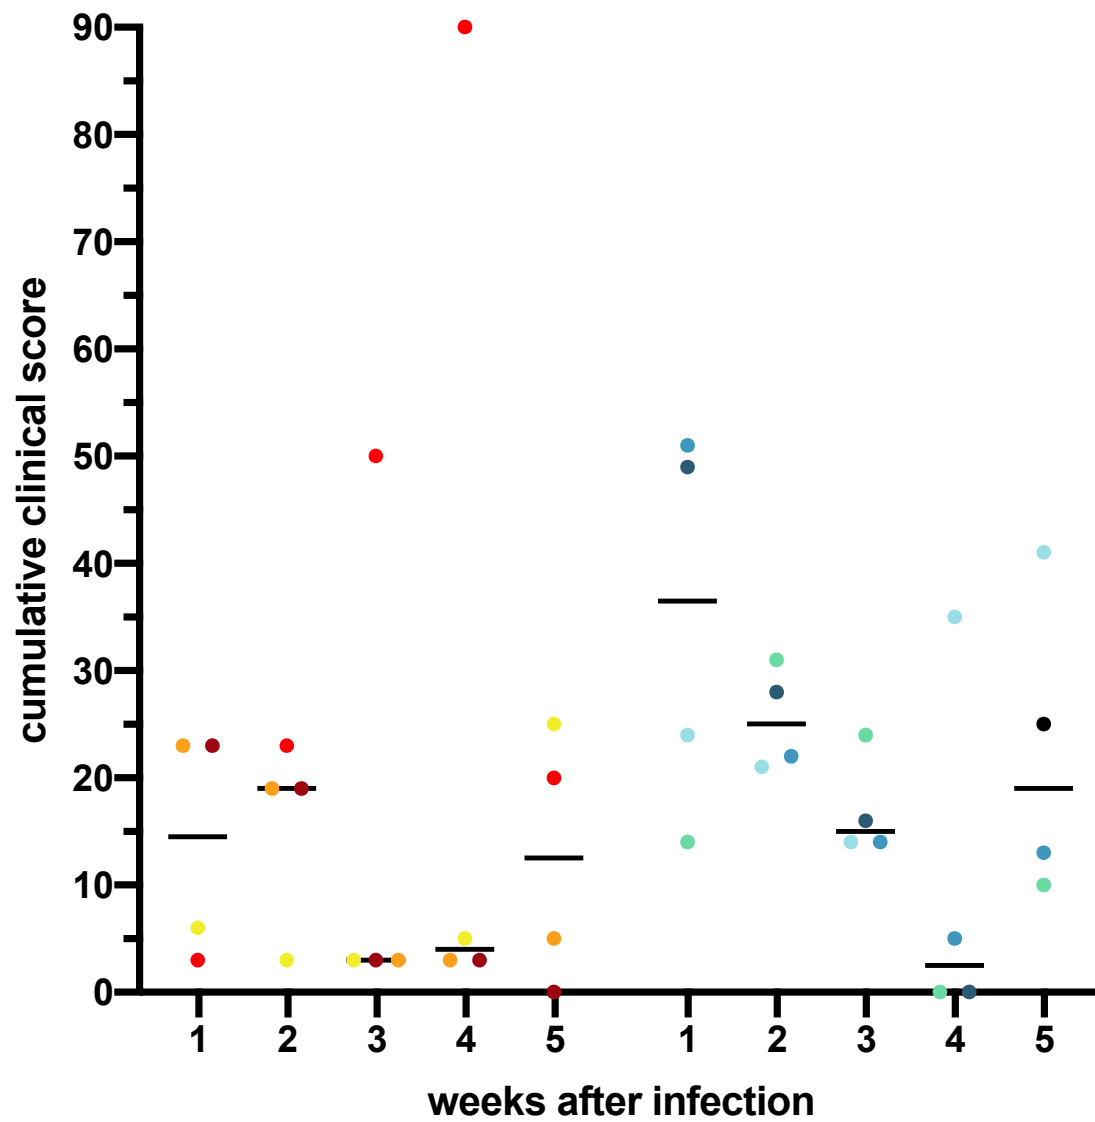

**Figure S3.** Cumulative clinical scores. Scores were calculated per week and per individual animal. Horizontal bars represent medians.

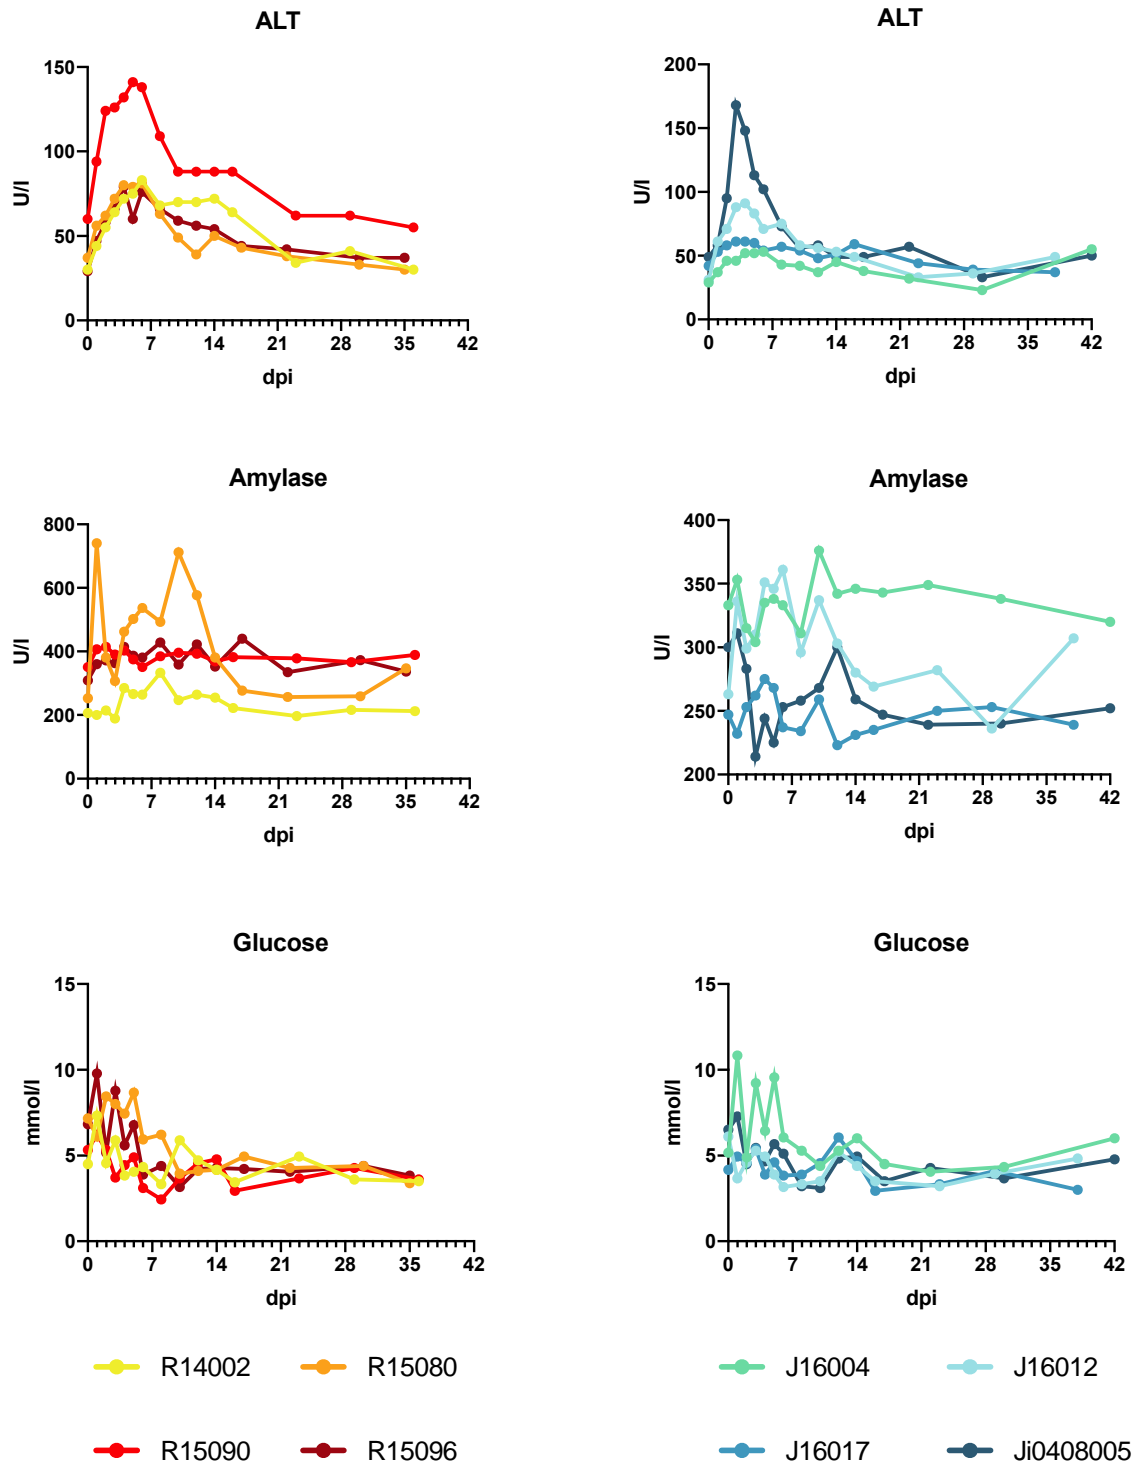

**Figure S4.** Clinical biochemistry. ALT (alanine aminotransferase), amylase and glucose levels were measured in serum samples of rhesus and cynomolgus macaques

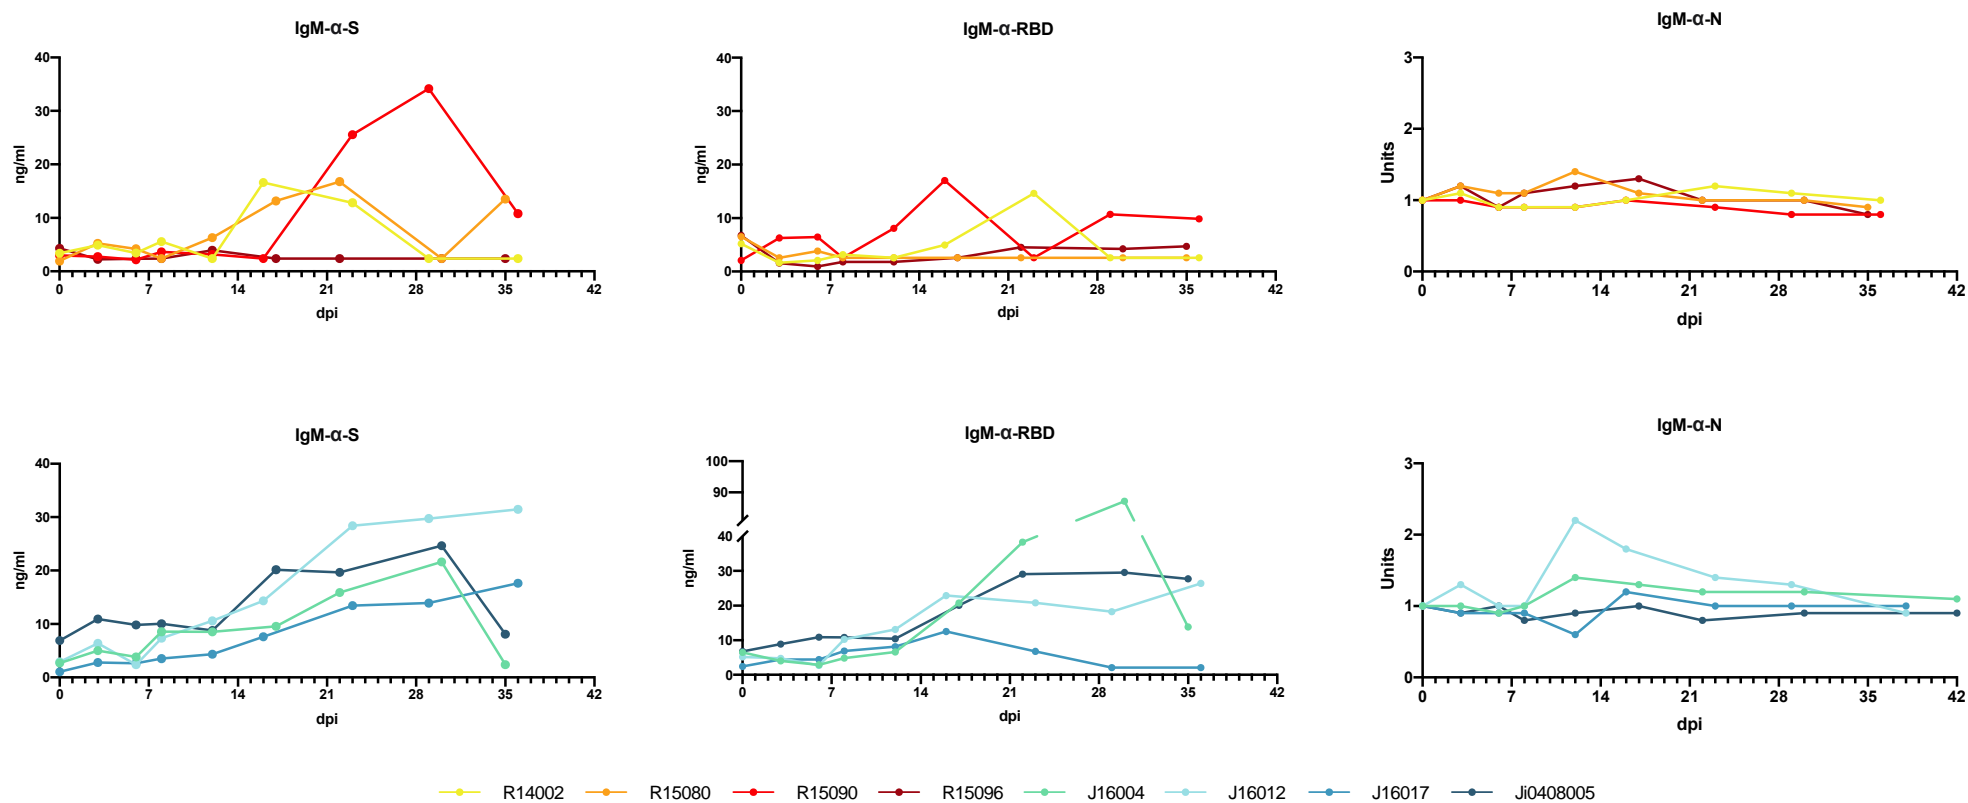

**Figure S5.** Development of SARS-CoV-2 IgM response in rhesus and cynomolgus macaques. The IgM response in serum was determined using an anti-S IgM ELISA, a serological test to detect IgM directed to the RBD, and an anti-N IgM ELISA (left to right).

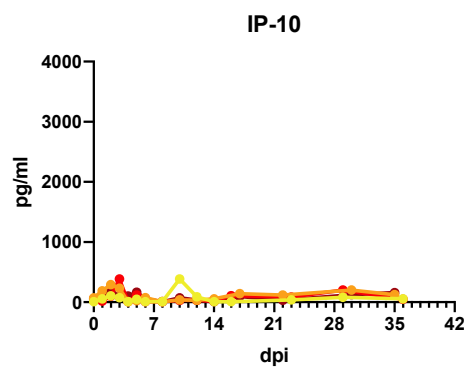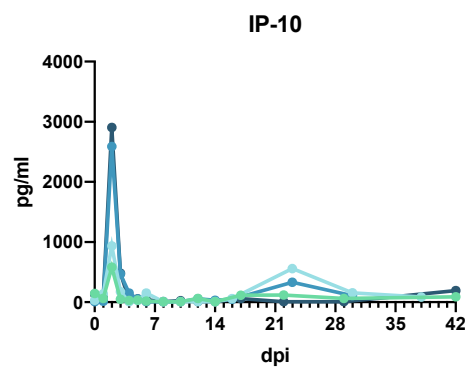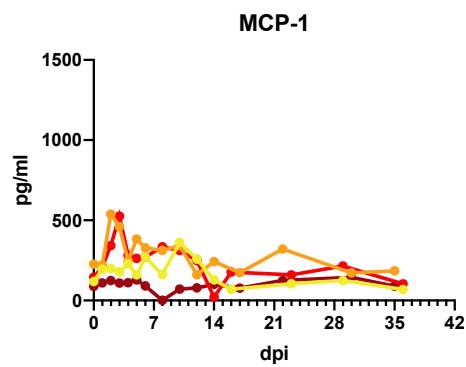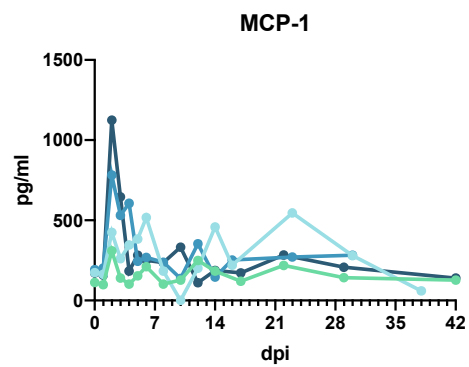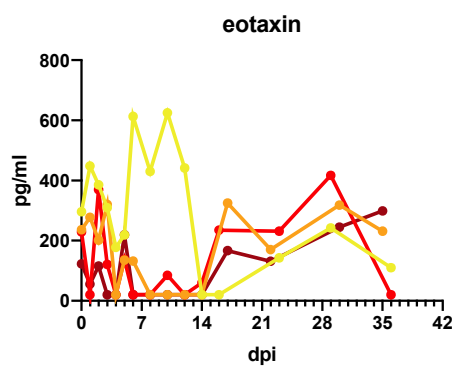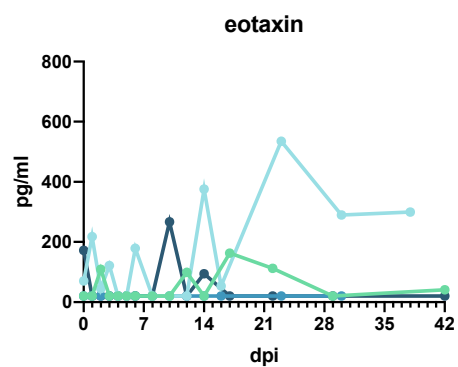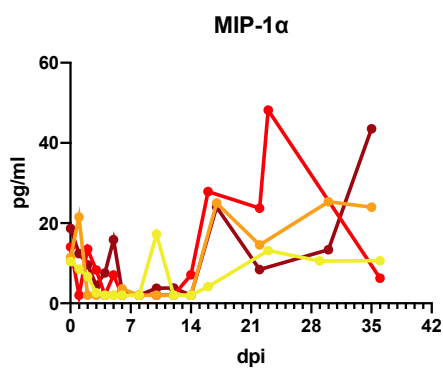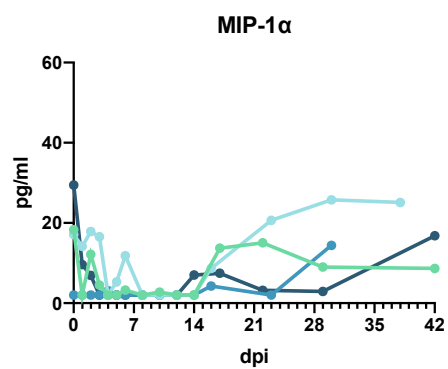

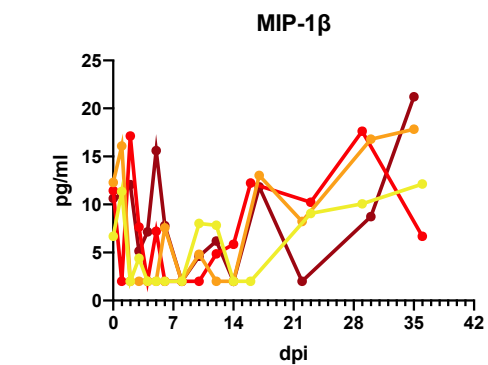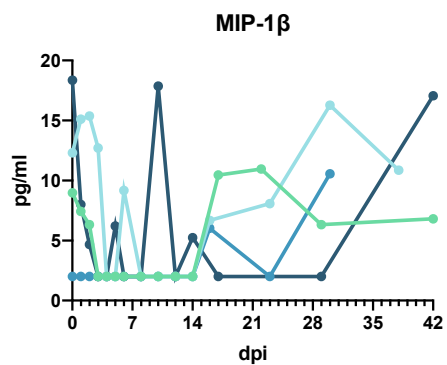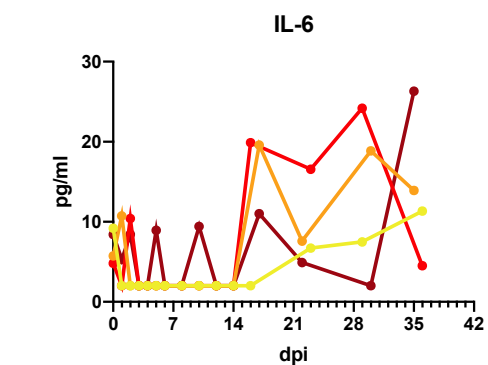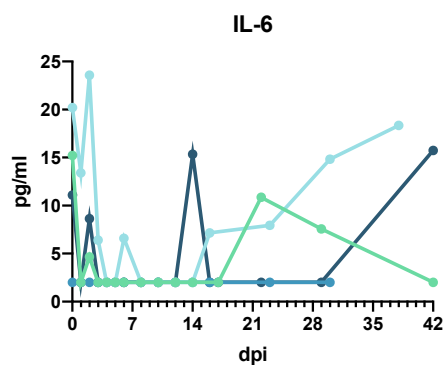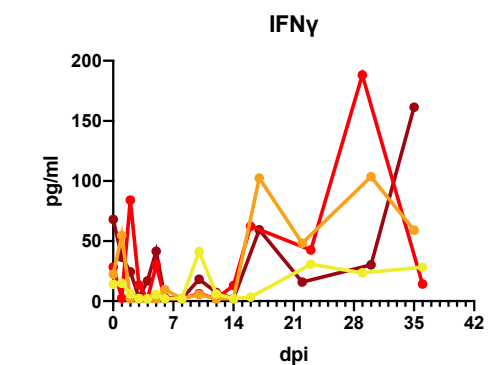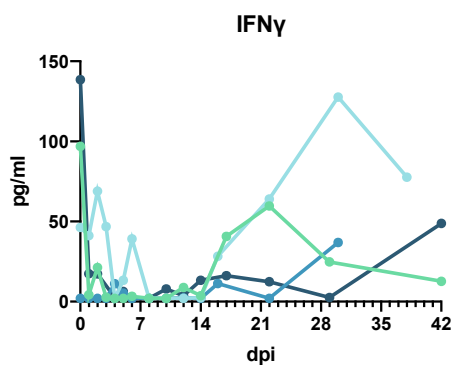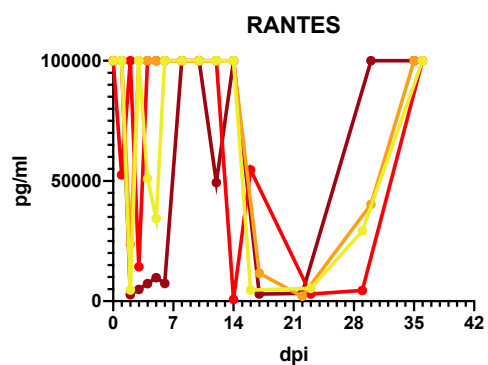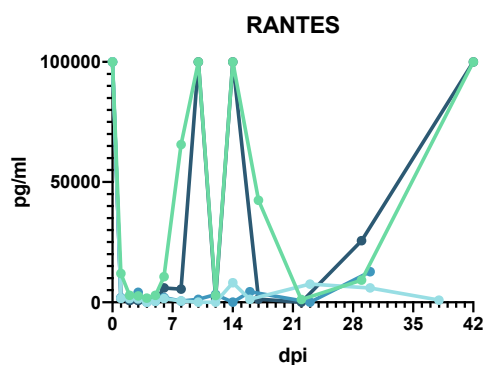

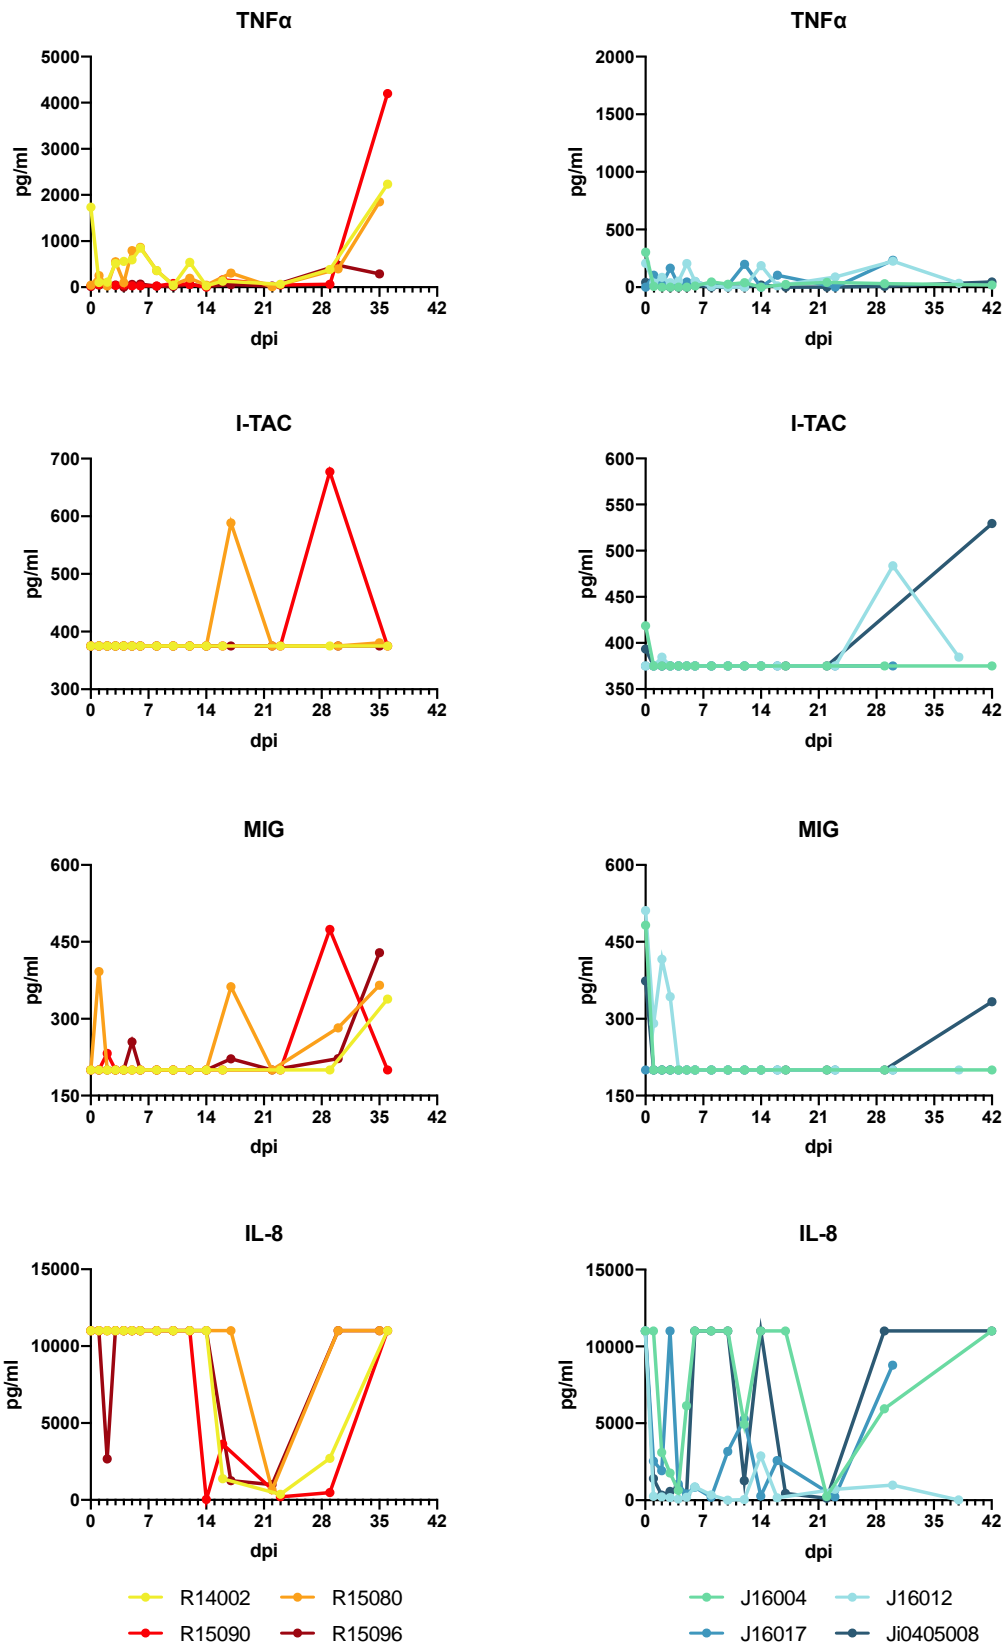

**Figure S6.** Cytokine and chemokine levels in SARS-CoV-2-infected macaques. Levels were determined using LEGENDplex™ NHP Chemokine/Cytokine Panel (13-plex). Samples were measured on a LSRII FACS machine and analyzed by using company software.



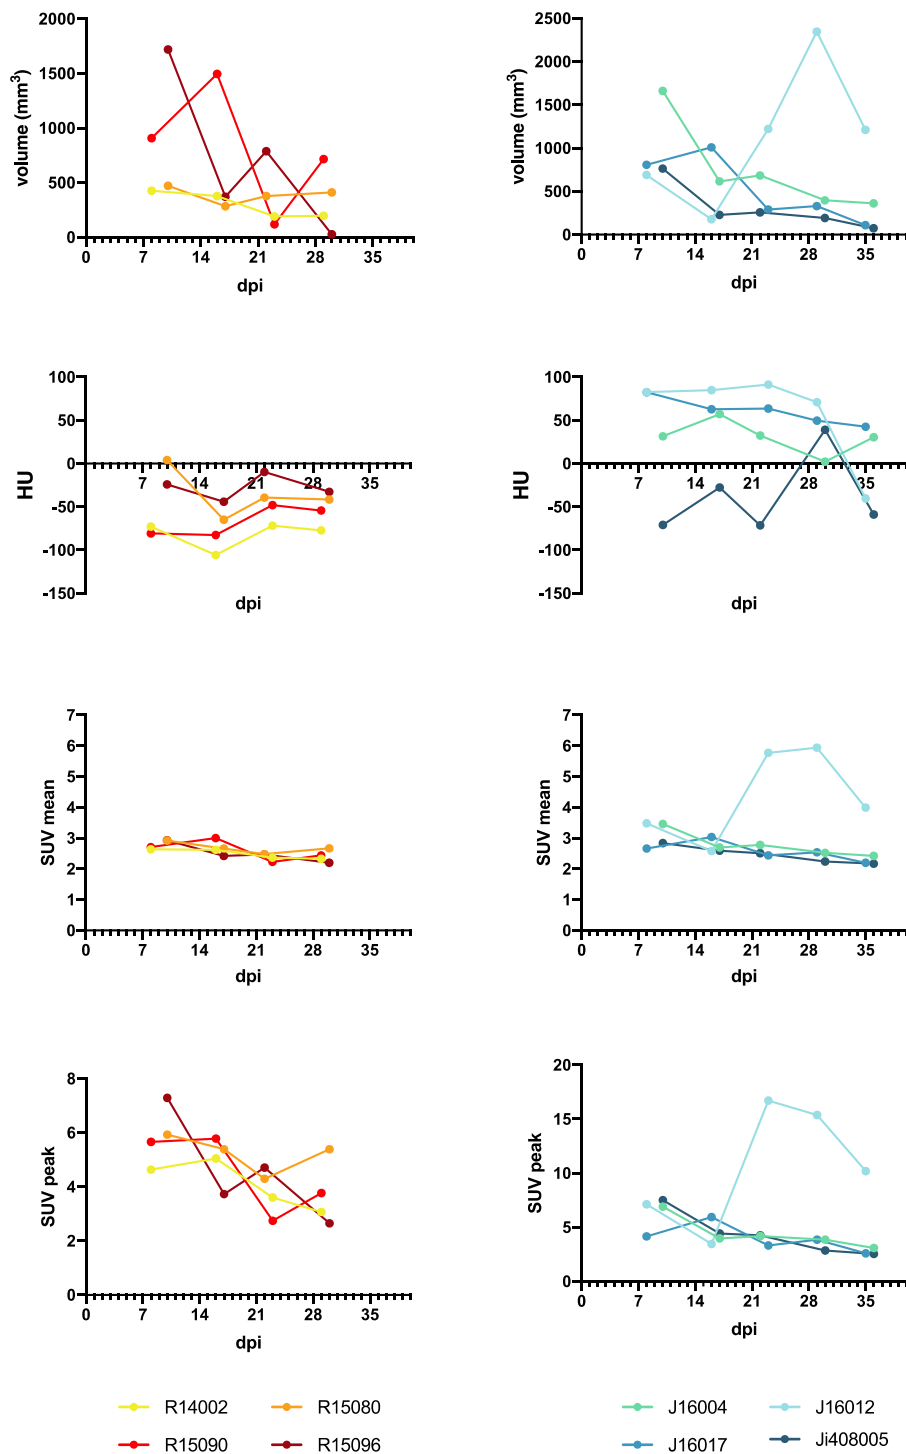

**Figure S7.** Quantification of  $^{18}\text{F}$ -FDG uptake by tracheobronchial lymph nodes. The tracheobronchial lymph nodes were quantified on PET-CT with two anatomical (upper rows) and two metabolic parameters (bottom rows). The anatomical parameters are; volume in mm<sup>3</sup> and density in Hounsfield Units (HUs). The metabolic parameters are the average metabolic uptake represented by the mean standard uptake value (SUV) and the maximum uptake in a region of interest (ROI), corrected for random and scattered coincidences represented by the SUV<sub>peak</sub>.

**Table S1. Macaques used in study.**

| Species | monkey ID | Age | Body weight <sup>#</sup> | Sex  |
|---------|-----------|-----|--------------------------|------|
| R       | R14002    | 6y  | 8.2 kg                   | male |
| R       | R15080    | 5y  | 7.9 kg                   | male |
| R       | R15090    | 5y  | 7.8 kg                   | male |
| R       | R15096    | 5y  | 8.7 kg                   | male |
| C       | J16004    | 4y  | 5.7 kg                   | male |
| C       | J16012    | 4y  | 3.3 kg                   | male |
| C       | J16017    | 4y  | 4.9 kg                   | male |
| C       | Ji0408005 | 16y | 9.7 kg                   | male |

R, rhesus macaque. C, cynomolgus macaque. <sup>#</sup> weight at start of study

**Table S2. Clinical scoring list**

| Parameter                      | Observation                                                                                                                    | Score |
|--------------------------------|--------------------------------------------------------------------------------------------------------------------------------|-------|
| <b>General Appearance</b>      | Normal                                                                                                                         | 0     |
|                                | Abnormal or Hunched Posture, Dull Appearance to Eyes                                                                           | 5     |
|                                | Dehydration, Notable Weight Loss, Swelling                                                                                     | 10    |
|                                | Bleeding from any Orifice (not related to routine procedures or menstruation)                                                  | 15    |
| <b>Skin and Fur</b>            | Normal                                                                                                                         | 0     |
|                                | Ruffled Fur, Unkept Appearance,                                                                                                | 5     |
|                                | Rash, Pallor, Redness, Icterus, Petechiae, Ecchymoses, Wound, Abscess, Ulcer                                                   | 10    |
| <b>Nose, Mouth, Eyes, Head</b> | Normal                                                                                                                         | 0     |
|                                | Nasal Discharge, Excessive Salivation, Ocular Discharge, Lacrimation, Reddened Eyes, Ptosis                                    | 5     |
| <b>Respiration</b>             | Normal                                                                                                                         | 0     |
|                                | Increased or Decreased Respirations (<30 or >40/min), Cough, Sneezing,                                                         | 5     |
|                                | Dyspnea or respiration rate >40/min                                                                                            | 15    |
|                                | Open Mouth Breathing respiration rate >50/min or Cyanosis                                                                      | 35    |
| <b>Food Intake</b>             | Normal                                                                                                                         | 0     |
|                                | Decreased (eating less than half the biscuits)                                                                                 | 3     |
|                                | Eating Fruit but no biscuits                                                                                                   | 5     |
|                                | Severely decreased (not eating biscuits or fruit)                                                                              | 10    |
| <b>Locomotor</b>               | Normal                                                                                                                         | 0     |
|                                | Hyperactivity (circling, increased aggression), Hypoactivity (hunched, inactive through window, active with people in room)    | 5     |
|                                | Ataxia, Neurological Signs (tremors, head tilt,), Loss of Interest in Treats                                                   | 10    |
|                                | Reluctant to Move, Uses Cage for Support, Difficulty Getting to Food or Water (decreased response to human presence), Seizures | 15    |
|                                | Down with no or Minimal Response to Human Approach, Coma                                                                       | 35    |

Adapted to Brining *et al.* 2010, Comparative Medicine, Vol 6, No 5, pp 389-395.

**Table S3A. Viral RNA loads in swabs and blood (RNA genome equivalents/ml)**

| <b>Nose</b>   | day 0 | day 1                  | day 2                  | day 3                  | day 4                  | day 5                  | day 6                  | day 8                  | day 10                 | day 12 | day 14 | day 22 | euthanasia |
|---------------|-------|------------------------|------------------------|------------------------|------------------------|------------------------|------------------------|------------------------|------------------------|--------|--------|--------|------------|
| R14002        | -     | 4.29 x 10 <sup>4</sup> | 2.57 x 10 <sup>2</sup> | -                      | -                      | -                      | -                      | -                      | -                      | -      | -      | -      | -          |
| R15080        | -     | 2.32 x 10 <sup>4</sup> | 1.20 x 10 <sup>3</sup> | 4.28 x 10 <sup>2</sup> | 1.80 x 10 <sup>3</sup> | -                      | -                      | -                      | -                      | -      | -      | -      | -          |
| R15090        | -     | 9.50 x 10 <sup>4</sup> | 2.20 x 10 <sup>3</sup> | 1.03 x 10 <sup>3</sup> | 2.79 x 10 <sup>3</sup> | -                      | -                      | -                      | -                      | -      | -      | -      | -          |
| R15096        | -     | 7.00 x 10 <sup>3</sup> | -                      | 4.28 x 10 <sup>2</sup> | -                      | -                      | -                      | -                      | -                      | -      | -      | -      | -          |
| J16004        | -     | 3.40 x 10 <sup>4</sup> | -                      | -                      | 2.10 x 10 <sup>3</sup> | -                      | -                      | -                      | -                      | -      | -      | -      | -          |
| J16012        | -     | 4.30 x 10 <sup>3</sup> | -                      | -                      | 2.14 x 10 <sup>3</sup> | -                      | -                      | -                      | -                      | -      | -      | -      | -          |
| J16017        | -     | 1.50 x 10 <sup>4</sup> | -                      | -                      | -                      | 9.86 x 10 <sup>2</sup> | 2.10 x 10 <sup>3</sup> | 2.14 x 10 <sup>3</sup> | -                      | -      | -      | -      | -          |
| Ji40805       | -     | 1.50 x 10 <sup>3</sup> | 4.90 x 10 <sup>4</sup> | 1.24 x 10 <sup>3</sup> | -                      | -                      | 4.71 x 10 <sup>2</sup> | -                      | -                      | -      | -      | -      | -          |
| <b>Throat</b> | day 0 | day 1                  | day 2                  | day 3                  | day 4                  | day 5                  | day 6                  | day 8                  | day 10                 | day 12 | day 14 | day 22 | euthanasia |
| R14002        | -     | 7.00 x 10 <sup>4</sup> | 1.43 x 10 <sup>5</sup> | 1.17 x 10 <sup>6</sup> | 2.45 x 10 <sup>5</sup> | 1.16 x 10 <sup>7</sup> | 3.19 x 10 <sup>6</sup> | 4.25 x 10 <sup>6</sup> | 3.58 x 10 <sup>5</sup> | -      | -      | -      | -          |
| R15080        | -     | 2.00 x 10 <sup>5</sup> | 2.40 x 10 <sup>6</sup> | 5.00 x 10 <sup>4</sup> | 4.29 x 10 <sup>4</sup> | -                      | -                      | -                      | -                      | -      | -      | -      | -          |
| R15090        | -     | 2.90 x 10 <sup>5</sup> | 1.40 x 10 <sup>5</sup> | 2.40 x 10 <sup>4</sup> | 7.03 x 10 <sup>3</sup> | 3.17 x 10 <sup>3</sup> | -                      | -                      | -                      | -      | -      | -      | -          |
| R15096        | -     | 1.70 x 10 <sup>4</sup> | -                      | -                      | -                      | -                      | -                      | -                      | -                      | -      | -      | -      | -          |
| J16004        | -     | 8.00 x 10 <sup>4</sup> | 4.10 x 10 <sup>4</sup> | 6.40 x 10 <sup>3</sup> | 3.86 x 10 <sup>2</sup> | -                      | -                      | -                      | -                      | -      | -      | -      | -          |
| J16012        | -     | 5.00 x 10 <sup>4</sup> | 2.50 x 10 <sup>5</sup> | -                      | -                      | -                      | -                      | -                      | -                      | -      | -      | -      | -          |
| J16017        | -     | 2.17 x 10 <sup>6</sup> | 1.80 x 10 <sup>8</sup> | 1.50 x 10 <sup>5</sup> | 9.30 x 10 <sup>6</sup> | 2.40 x 10 <sup>5</sup> | 8.83 x 10 <sup>3</sup> | -                      | -                      | -      | -      | -      | -          |
| Ji40805       | -     | 2.70 x 10 <sup>4</sup> | 9.10 x 10 <sup>4</sup> | 5.14 x 10 <sup>2</sup> | -                      | -                      | 9.43 x 10 <sup>2</sup> | -                      | -                      | -      | -      | -      | -          |
| <b>Anal</b>   | day 0 | day 1                  | day 2                  | day 3                  | day 4                  | day 5                  | day 6                  | day 8                  | day 10                 | day 12 | day 14 | day 22 | euthanasia |
| R14002        | -     | -                      | -                      | -                      | -                      | -                      | -                      | -                      | -                      | -      | -      | -      | -          |
| R15080        | -     | -                      | -                      | -                      | 3.43 x 10 <sup>2</sup> | 1.29 x 10 <sup>2</sup> | -                      | -                      | -                      | -      | -      | -      | -          |
| R15090        | -     | -                      | -                      | -                      | -                      | -                      | -                      | -                      | -                      | -      | -      | -      | -          |
| R15096        | -     | -                      | -                      | -                      | -                      | -                      | -                      | -                      | -                      | -      | -      | -      | -          |
| J16004        | -     | -                      | -                      | -                      | 1.76 x 10 <sup>3</sup> | -                      | -                      | -                      | -                      | -      | -      | -      | -          |
| J16012        | -     | -                      | -                      | -                      | -                      | -                      | -                      | -                      | -                      | -      | -      | -      | -          |
| J16017        | -     | 3.00 x 10 <sup>3</sup> | -                      | -                      | -                      | 2.10 x 10 <sup>3</sup> | -                      | -                      | -                      | -      | -      | -      | -          |
| Ji40805       | -     | -                      | -                      | -                      | -                      | -                      | -                      | -                      | -                      | -      | -      | -      | -          |
| <b>Blood</b>  | day 0 | day 1                  | day 2                  | day 3                  | day 4                  | day 5                  | day 6                  | day 8                  | day 10                 | day 12 | day 14 | day 22 | euthanasia |
| R14002        | -     | -                      | -                      | -                      | -                      | -                      | -                      | -                      | -                      | -      | -      | -      | -          |
| R15080        | -     | -                      | -                      | -                      | -                      | 8.66 x 10 <sup>3</sup> | -                      | -                      | -                      | -      | -      | -      | -          |
| R15090        | -     | -                      | -                      | -                      | -                      | -                      | -                      | -                      | -                      | -      | -      | -      | -          |
| R15096        | -     | -                      | -                      | -                      | -                      | -                      | -                      | -                      | -                      | -      | -      | -      | -          |
| J16004        | -     | -                      | -                      | -                      | -                      | -                      | -                      | -                      | -                      | -      | -      | -      | -          |
| J16012        | -     | -                      | -                      | -                      | -                      | -                      | -                      | -                      | -                      | -      | -      | -      | -          |
| J16017        | -     | -                      | -                      | -                      | -                      | -                      | -                      | -                      | -                      | -      | -      | -      | -          |
| Ji40805       | -     | -                      | -                      | -                      | -                      | -                      | -                      | -                      | -                      | -      | -      | -      | -          |

**Table S3B. Subgenomic messenger RNA loads in nose and throat swabs (sgmRNA copies/ml)**

| <b>Nose</b>   | day 0 | day 1              | day 2              | day 3              | day 4              | day 5              | day 6              | day 8              | day 10             | day 12 | day 14 | day 22 | euthanasia |
|---------------|-------|--------------------|--------------------|--------------------|--------------------|--------------------|--------------------|--------------------|--------------------|--------|--------|--------|------------|
| R14002        | -     | -                  | -                  | -                  | -                  | -                  | -                  | -                  | -                  | -      | -      | -      | -          |
| R15080        | -     | -                  | -                  | -                  | -                  | -                  | -                  | -                  | -                  | -      | -      | -      | -          |
| R15090        | -     | -                  | -                  | -                  | -                  | -                  | -                  | -                  | -                  | -      | -      | -      | -          |
| R15096        | -     | -                  | -                  | -                  | -                  | -                  | -                  | -                  | -                  | -      | -      | -      | -          |
| J16004        | -     | -                  | -                  | -                  | -                  | -                  | -                  | -                  | -                  | -      | -      | -      | -          |
| J16012        | -     | -                  | -                  | -                  | -                  | -                  | -                  | -                  | -                  | -      | -      | -      | -          |
| J16017        | -     | -                  | -                  | -                  | -                  | -                  | -                  | -                  | -                  | -      | -      | -      | -          |
| Ji40805       | -     | -                  | -                  | -                  | -                  | -                  | -                  | -                  | -                  | -      | -      | -      | -          |
| <b>Throat</b> | day 0 | day 1              | day 2              | day 3              | day 4              | day 5              | day 6              | day 8              | day 10             | day 12 | day 14 | day 22 | euthanasia |
| R14002        | -     | $7.88 \times 10^3$ | $3.96 \times 10^4$ | $2.07 \times 10^5$ | $5.06 \times 10^4$ | $1.12 \times 10^6$ | $6.74 \times 10^5$ | $4.92 \times 10^5$ | $4.15 \times 10^4$ | -      | -      | -      | -          |
| R15080        | -     | $3.40 \times 10^4$ | $8.65 \times 10^5$ | $1.71 \times 10^2$ | -                  | -                  | -                  | -                  | -                  | -      | -      | -      | -          |
| R15090        | -     | $3.32 \times 10^4$ | $4.64 \times 10^4$ | -                  | -                  | -                  | -                  | -                  | -                  | -      | -      | -      | -          |
| R15096        | -     | -                  | -                  | -                  | -                  | -                  | -                  | -                  | -                  | -      | -      | -      | -          |
| J16004        | -     | $6.17 \times 10^3$ | $3.37 \times 10^4$ | -                  | -                  | -                  | -                  | -                  | -                  | -      | -      | -      | -          |
| J16012        | -     | $1.29 \times 10^2$ | $2.03 \times 10^4$ | -                  | -                  | -                  | -                  | -                  | -                  | -      | -      | -      | -          |
| J16017        | -     | $3.36 \times 10^5$ | $3.94 \times 10^7$ | $7.79 \times 10^4$ | $3.58 \times 10^6$ | -                  | -                  | -                  | -                  | -      | -      | -      | -          |
| Ji40805       | -     | -                  | $1.50 \times 10^4$ | -                  | -                  | -                  | -                  | -                  | -                  | -      | -      | -      | -          |

**Table S4. Viral RNA detection in organs of SARS-CoV-2-infected macaques.**

|                               | R14002                                                                                | R15080                   | R15090                   | R15096                    | J16012                                         | J16017                                                             | J408005                               | J16004                    |
|-------------------------------|---------------------------------------------------------------------------------------|--------------------------|--------------------------|---------------------------|------------------------------------------------|--------------------------------------------------------------------|---------------------------------------|---------------------------|
| Skin lesion                   | -                                                                                     | -                        | -                        | -                         | -                                              | 1 x 10 <sup>4</sup>                                                | -                                     | -                         |
| Conjunctiva                   | -                                                                                     | -                        | -                        | -                         | -                                              | 3.88 x 10 <sup>4</sup>                                             | -                                     | -                         |
| Tongue mucosa                 | -                                                                                     | -                        | -                        | -                         | -                                              | -                                                                  | -                                     | -                         |
| Nasal mucosa                  | -                                                                                     | -                        | -                        | -                         | -                                              | -                                                                  | -                                     | -                         |
| Pharyngeal mucosa             | -                                                                                     | -                        | -                        | -                         | -                                              | 7.7 x 10 <sup>4</sup>                                              | 3.6 x 10 <sup>3</sup>                 | -                         |
| Laryngeal mucosa              | -                                                                                     | -                        | -                        | -                         | -                                              | 1.23 x 10 <sup>5</sup>                                             | -                                     | -                         |
| Deep cervical lymph node (LN) | -                                                                                     | -                        | -                        | -                         | -                                              | 3.4 x 10 <sup>3</sup>                                              | -                                     | -                         |
| tonsil                        | -                                                                                     | -                        | -                        | -                         | -                                              | -                                                                  | -                                     | -                         |
| Mesenteric LN                 | 3.08 x 10 <sup>4</sup>                                                                | -                        | -                        | -                         | -                                              | 4.8 x 10 <sup>3</sup>                                              | -                                     | -                         |
| heart, right atrium           | -                                                                                     | -                        | -                        | -                         | -                                              | 4.76 x 10 <sup>4</sup>                                             | -                                     | -                         |
| heart, left atrium            | 8.82 x 10 <sup>5</sup>                                                                | -                        | -                        | -                         | -                                              | -                                                                  | -                                     | -                         |
| heart, right ventricle        | 1.62 x 10 <sup>5</sup>                                                                | -                        | -                        | -                         | -                                              | 1.15 x 10 <sup>5</sup>                                             | -                                     | -                         |
| heart, left ventricle         | -                                                                                     | -                        | -                        | -                         | -                                              | 3.52 x 10 <sup>4</sup>                                             | -                                     | -                         |
| liver                         | -                                                                                     | -                        | -                        | -                         | -                                              | 5.93 x 10 <sup>2</sup>                                             | -                                     | -                         |
| spleen                        | -                                                                                     | -                        | -                        | -                         | -                                              | 2.13 x 10 <sup>3</sup>                                             | -                                     | -                         |
| kidney                        | -                                                                                     | -                        | -                        | -                         | -                                              | 1.08 x 10 <sup>4</sup>                                             | -                                     | -                         |
| jejunum                       | -                                                                                     | -                        | -                        | -                         | -                                              | -                                                                  | -                                     | -                         |
| ileum                         | -                                                                                     | -                        | -                        | -                         | -                                              | -                                                                  | -                                     | -                         |
| colon                         | -                                                                                     | -                        | -                        | -                         | -                                              | -                                                                  | -                                     | -                         |
| Salivary gland                | -                                                                                     | -                        | -                        | -                         | -                                              | 1.38 x 10 <sup>4</sup>                                             | -                                     | -                         |
| carina                        | 8.8 x 10 <sup>3</sup>                                                                 | -                        | -                        | -                         | 4.4 x 10 <sup>3</sup>                          | -                                                                  | -                                     | -                         |
| lung, upper right lobe        | -                                                                                     | -                        | -                        | -                         | 2.2 x 10 <sup>3</sup>                          | -                                                                  | 5.2 x 10 <sup>3</sup>                 | -                         |
| lung, accessory lobe          | -                                                                                     | -                        | -                        | -                         | 3.08 x 10 <sup>3</sup>                         | -                                                                  | -                                     | -                         |
| lung, middle right lobe       | 2.74 x 10 <sup>4</sup>                                                                | -                        | -                        | -                         | -                                              | -                                                                  | -                                     | -                         |
| lung, lower right lobe        | 4.28 x 10 <sup>4</sup>                                                                | -                        | -                        | -                         | -                                              | -                                                                  | -                                     | -                         |
| lung, upper left lobe         | 2.2 x 10 <sup>4</sup>                                                                 | -                        | -                        | -                         | -                                              | -                                                                  | -                                     | -                         |
| lung, middle left lobe        | 1.9 x 10 <sup>4</sup>                                                                 | -                        | -                        | -                         | -                                              | -                                                                  | -                                     | -                         |
| lung, lower left lobe         | 6.59 x 10 <sup>4</sup>                                                                | -                        | -                        | -                         | -                                              | -                                                                  | -                                     | -                         |
| Calf vein                     | -                                                                                     | -                        | -                        | -                         | -                                              | 1.5 x 10 <sup>4</sup>                                              | -                                     | -                         |
| Bronchus left                 | -                                                                                     | -                        | -                        | -                         | -                                              | 1.5 x 10 <sup>4</sup>                                              | -                                     | -                         |
| Bronchus right                | -                                                                                     | -                        | -                        | -                         | -                                              | 3.2 x 10 <sup>3</sup>                                              | -                                     | -                         |
| trachea                       | -                                                                                     | -                        | -                        | -                         | -                                              | 7.43 x 10 <sup>4</sup>                                             | -                                     | -                         |
| Left paratracheal LN*         | 6.43 x 10 <sup>5</sup><br>nd                                                          | -<br>nd                  | -<br>nd                  | -<br>nd                   | -<br>nd                                        | 2 x 10 <sup>5</sup><br>8.24 x 10 <sup>5</sup>                      | nd<br>nd                              | -<br>nd                   |
| Left hilar (bronchial) LN*    | 9.82 x 10 <sup>5</sup><br>4.72 x 10 <sup>3</sup><br>5.67 x 10 <sup>4</sup><br>-<br>nd | -<br>-<br>-<br>nd<br>nd  | -<br>-<br>nd<br>nd<br>nd | -<br>-<br>-<br>-<br>-     | 7.47 x 10 <sup>3</sup><br>-<br>-<br>-<br>nd    | 2.58 x 10 <sup>4</sup><br>6.02 x 10 <sup>4</sup><br>nd<br>nd<br>nd | -<br>-<br>-<br>-<br>-                 | -<br>-<br>nd<br>nd<br>nd  |
| Subcarinal LN*                | -<br>nd<br>nd<br>nd<br>nd                                                             | -<br>-<br>nd<br>nd<br>nd | -<br>-<br>-<br>-<br>-    | -<br>nd<br>nd<br>nd<br>nd | 2.58 x 10 <sup>4</sup><br>nd<br>nd<br>nd<br>nd | 1.14 x 10 <sup>4</sup><br>nd<br>nd<br>nd<br>nd                     | -<br>nd<br>nd<br>nd<br>nd             | -<br>nd<br>nd<br>nd<br>nd |
| Right hilar (bronchial) LN*   | 9.61 x 10 <sup>4</sup><br>-<br>-<br>nd                                                | -<br>-<br>-<br>nd        | -<br>nd<br>nd<br>nd      | -<br>-<br>nd<br>nd        | 5.65 x 10 <sup>4</sup><br>-<br>-<br>-          | 8.52 x 10 <sup>4</sup><br>nd<br>nd<br>nd                           | 4.11 x 10 <sup>4</sup><br>-<br>-<br>- | -<br>-<br>-<br>nd         |
| Right paratracheal LN*        | nd<br>nd<br>nd                                                                        | nd<br>nd<br>nd           | -<br>-<br>-              | nd<br>nd<br>nd            | 5.39 x 10 <sup>4</sup><br>nd<br>nd             | 9.81 x 10 <sup>4</sup><br>nd<br>6.47 x 10 <sup>3</sup>             | nd<br>nd<br>nd                        | nd<br>nd<br>nd            |

Amount of viral RNA is given as genome equivalents per gram of tissue. Only tissue samples that were PCR-positive in at least one of the animals are shown in the table.

\*Number of lymph nodes sampled from the respiratory tract varied between individual animals. nd; not done.

**Table S5. List of consumables**

| name                                                   | source                           | catalog number |
|--------------------------------------------------------|----------------------------------|----------------|
| ABC-HRP kit                                            | Vectastain                       | PK-6100        |
| Anti-SARS-CoV-2                                        | Thermo Fisher Scientific         | MA1 7403       |
| Anti-Spike-RBD-hIgA (CR3022)                           | Abcam Ltd                        | ab278112       |
| Anti-Spike-RBD-hIgG1 (CR3022)                          | Abcam Ltd                        | ab273073       |
| Anti-Spike-RBD-hIgM (CR3022)                           | Abcam Ltd                        | ab278111       |
| anti-Thyroid Transcription Factor -1                   | DAKO                             | M3575          |
| biotinylated rabbit-anti-mouse-IgG F(ab') <sub>2</sub> | Sigma Aldrich                    | SAB3701007     |
| BSA                                                    | Merck Life Science/Sigma Aldrich | A9647          |
| Copan FLOQSwabs                                        | MLS                              | M101491        |
| DAB                                                    | Vectastain                       | SK-4150        |
| EDTA                                                   | VWR                              | 1084521000     |
| fungizone                                              | Fischer Scientific               | 15290-018      |
| gentleMACS M tubes                                     | Miltenyi Biotec B.V              | 130-096-335    |
| Goat-anti-human (H+L) IgG-HRP                          | Thermo Fisher Scientific         | 31310          |
| Goat-anti-human- IgM-Peroxidase                        | Sanbio SBA                       | 2020-05        |
| half-area ELISA plates                                 | Greiner Bio-One                  | 675061         |
| hematoxylin                                            | Brunschwig Chemie BV             | H-3404         |
| ketamine hydrochloride                                 | Alfasan                          | 1809284-05     |
| LEGENDplex™ NHP Chemokine/Cytokine Panel               | BioLegend                        | 740317         |
| MEM                                                    | Thermo Fischer Scientific        | 31095052       |
| monomeric full-length Spike protein                    | Expresion Biotech                | S2-46-001      |
| monomeric full-length Spike RBD protein                | Expresion Biotech                | S2-45-001      |
| mouse anti SARS-Cov-2-NP ( )                           | Thermo Fisher;                   | MA1-7403       |
| normal Goat serum                                      | DAKO                             | X0907          |
| OptiView DAB IHC Detection Kit                         | Roche Diagnostics                | 760700         |
| PBS, pH 7.4                                            | Thermo Fischer Scientific        | 10010023       |
| penicillin-streptomycin                                | Life Technologies - Invitrogen   | 15140122       |
| QIAamp Viral RNA mini kit                              | QIAGEN Benelux B.V.              | 52906          |
| SedaStart                                              | AST Farma B.V                    | 19F252         |
| SedaStop                                               | AST Farma B.V                    | 19D122         |
| Stop                                                   | DIAsource Immuno Assays SA       | SS02-1         |
| TMB                                                    | DIAsource Immuno Assays SA       | SB04-B         |
| TMB substrate                                          | Life Technologies - Invitrogen   | 34029          |
| Transcriptor First Strand cDNA Synthesis kit           | Roche Diagnostics                | 4896866001     |
| Tris Base                                              | VWR                              | 1648311        |
| Tween-20                                               | VWR                              | 28.829.296     |
| Tween-20                                               | Merck life Science NV            | P1379          |
| xylene                                                 | Biosolve Chemicals               | 24250502       |
